# Supplementary material
Source: PubMed Central journal article supplement (PMC2901918)

### **Supplementary Figure 1. Expression of T-bet and IL-17F in differentiated Th17 cells**

Real-time PCR analysis of T-bet expression in differentiating Th17 cells and in committed Th17 cells after the 2<sup>nd</sup> stimulation (a). Concentrations of IL-17F in 72 h supernatants collected from cell cultures after 1<sup>st</sup> and 2<sup>nd</sup> stimulation as described in Figure 2 (b). \* $p < 0.001$ . Data are representative of 2 experiments. (error bars, s.e.m).

### **Supplementary Figure 2. Increased IL-27 concentration in culture does not suppress committed Th17 cells.**

Th17 cells differentiated from 2D2 splenocytes were reactivated in the presence of MOG<sub>35-55</sub> (20 µg/ml), IL-23 and increasing concentrations of IL-27 (0, 10, 50 and 100 ng/ml) during 72 h. Cells were then activated with PMA and ionomycin in the presence of GolgiPlug for 4 h and analysed by flow cytometry for the expression of IL-17A and IFN-γ on gated CD4<sup>+</sup> cells (a). IL-17A levels were measured by ELISA in the supernatants of cells activated during 72 h in the presence of IL-23 and IL-27 (b). Changes in IL-17A concentration (%) when IL-27 was added to the culture compared to PBS are indicated above the bars. Data are representative of two experiments. (error bars, s.e.m).

### **Supplementary Figure 3. Th17 cells retain their phenotype during three rounds of stimulation.**

Th17 cells that underwent a 2<sup>nd</sup> stimulation in the presence of TGF-β+IL-6 were rested 2 days in the presence of IL-2 and then restimulated (3<sup>rd</sup> stimulation) with anti-CD3 and anti-CD28 antibodies, in the presence of cytokine combinations indicated on each panel. After 72 h cells

were stimulated with PMA and ionomycin in the presence of GolgiPlug for the final 4 h, stained and analyzed by flow cytometry for IL-17A and IFN- $\gamma$  expression.

**Supplementary Figure 4. Th17 cells do not retain their phenotype in the presence of IL-12**

Splenocytes from 2D2 mice were activated with MOG<sub>35-55</sub> peptide (20  $\mu$ g/ml) in the presence of TGF- $\beta$ +IL-6 for 72 h (1<sup>st</sup> stimulation). Following the 1<sup>st</sup> stimulation, cells were rested 48 h in the presence of IL-2 and then reactivated with peptide (2<sup>nd</sup> stimulation) during 3 days in the presence of cytokines indicated on each panel. After each stimulation, cells were activated with PMA and ionomycin in the presence of GolgiPlug for the final 4 h, stained and analyzed by flow cytometry for IL-17A and IFN- $\gamma$  expression in CD4<sup>+</sup> cells.

**Supplementary Figure 5. Resistance of committed Th17 cells to IL-27 is not modified by accessory cells or antigen specific stimulation.**

Splenocytes from C57BL/6 (a) or 2D2 mice (c) were activated with anti-CD3 and anti-CD28 antibodies (B6 mice) or MOG<sub>35-55</sub> peptide (20  $\mu$ g/ml; 2D2 mice) in the presence of TGF- $\beta$ +IL-6 ( $\pm$  IL-27) for 72 h (1<sup>st</sup> stimulation). Following the 1<sup>st</sup> stimulation, cells were rested 48 h in the presence of IL-2 and then reactivated with antibodies or peptide (2<sup>nd</sup> stimulation) for 3 days in the presence of cytokine combinations indicated on each panel. After 72 h cells were stimulated with PMA and ionomycin in the presence of GolgiPlug for the final 4 h, stained and analyzed by flow cytometry for IL-17A and IFN- $\gamma$  expression in CD4<sup>+</sup> cells. IL-17A levels in B6 cultures (b) and 2D2 cultures (d) were measured by ELISA in the supernatants of cells activated during 72 h as described above. Changes in IL-17A concentration (%) when

IL-27 was added to the culture compared to PBS are indicated above the bars. Data are representative of two experiments. (error bars, s.e.m).

## Supplementary Figure 1

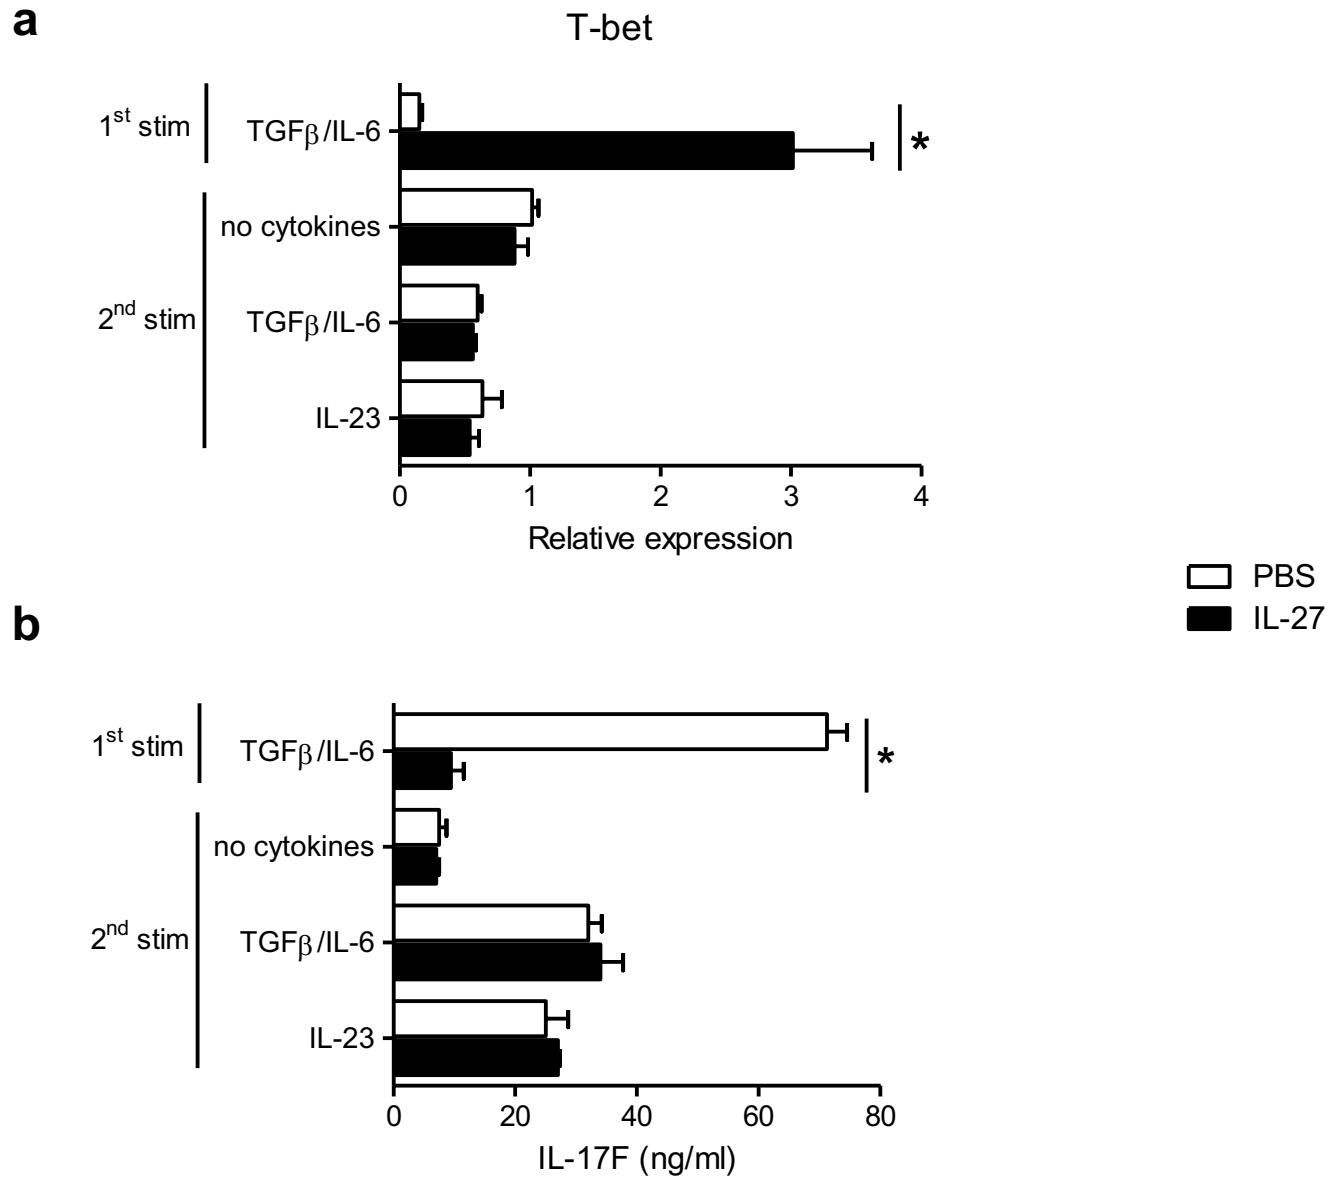

# Supplementary Figure 2

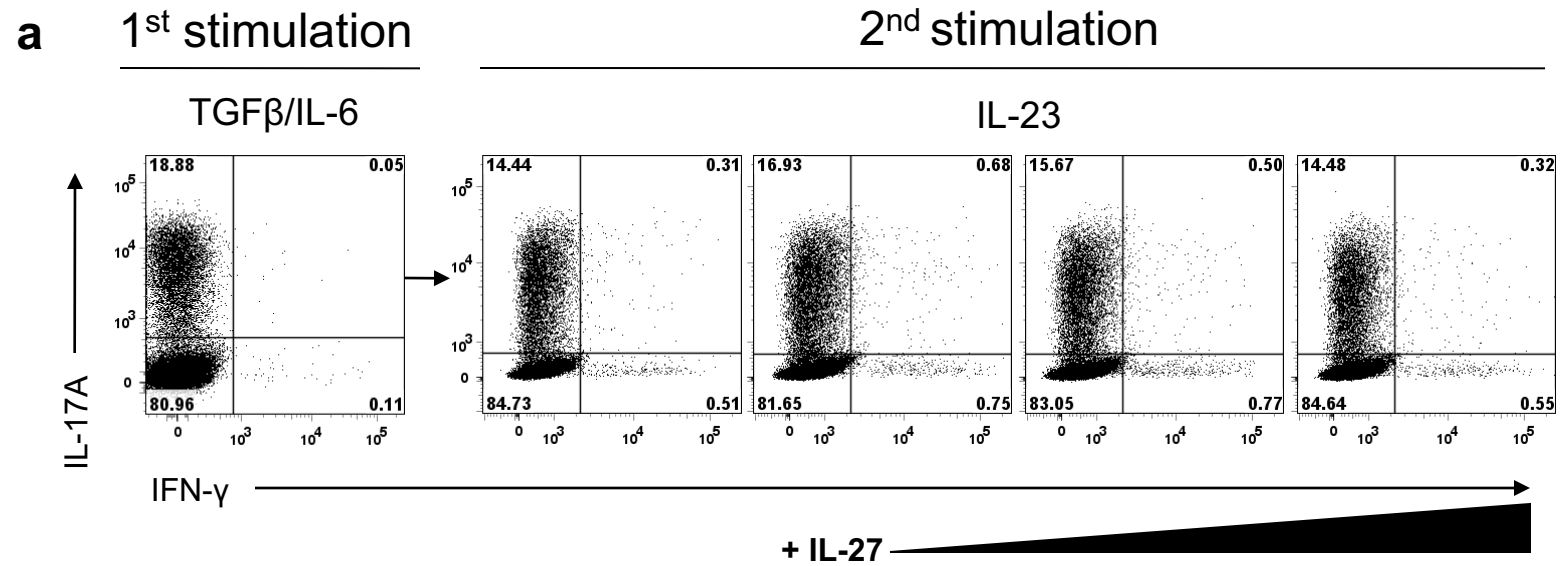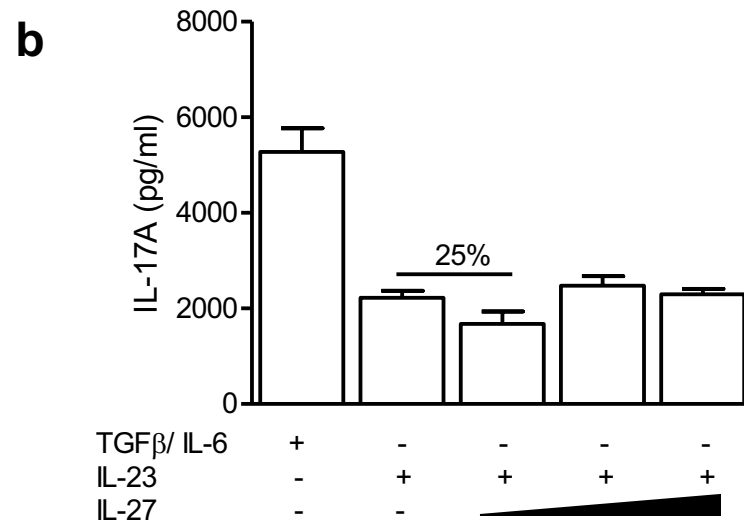

# Supplementary Figure 3

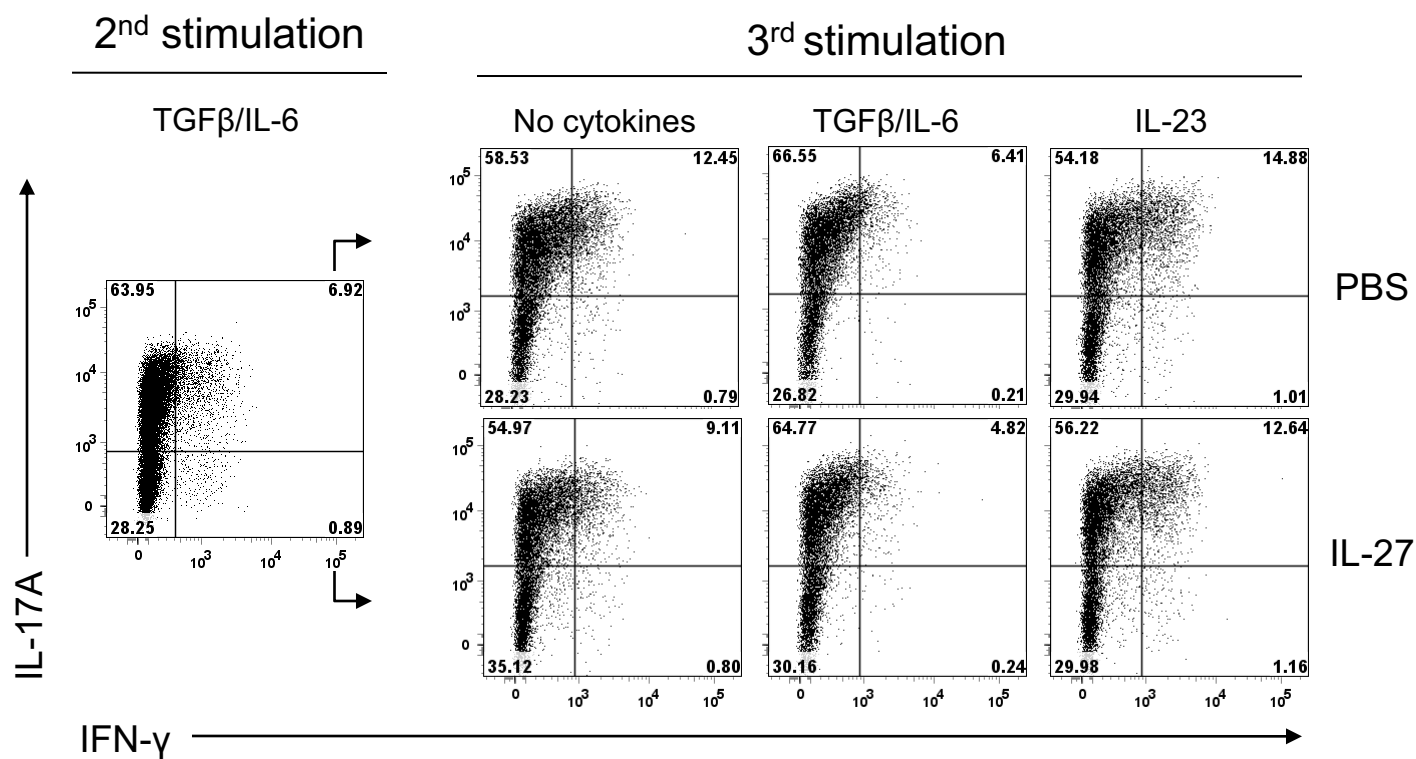

## Supplementary Figure 4

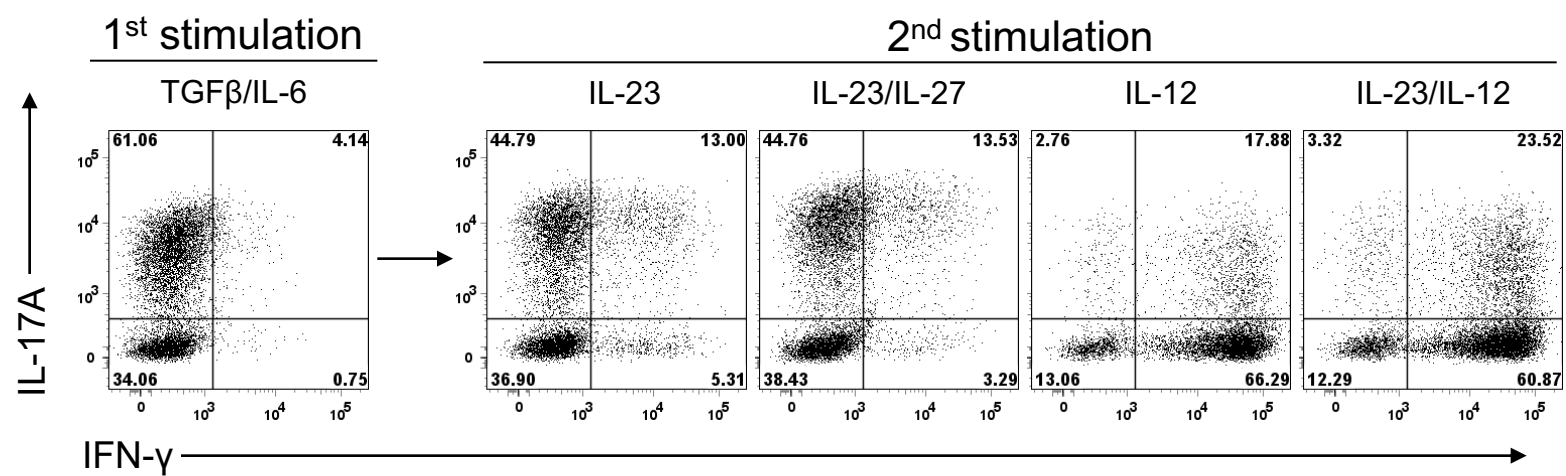

## 2<sup>nd</sup> stimulation

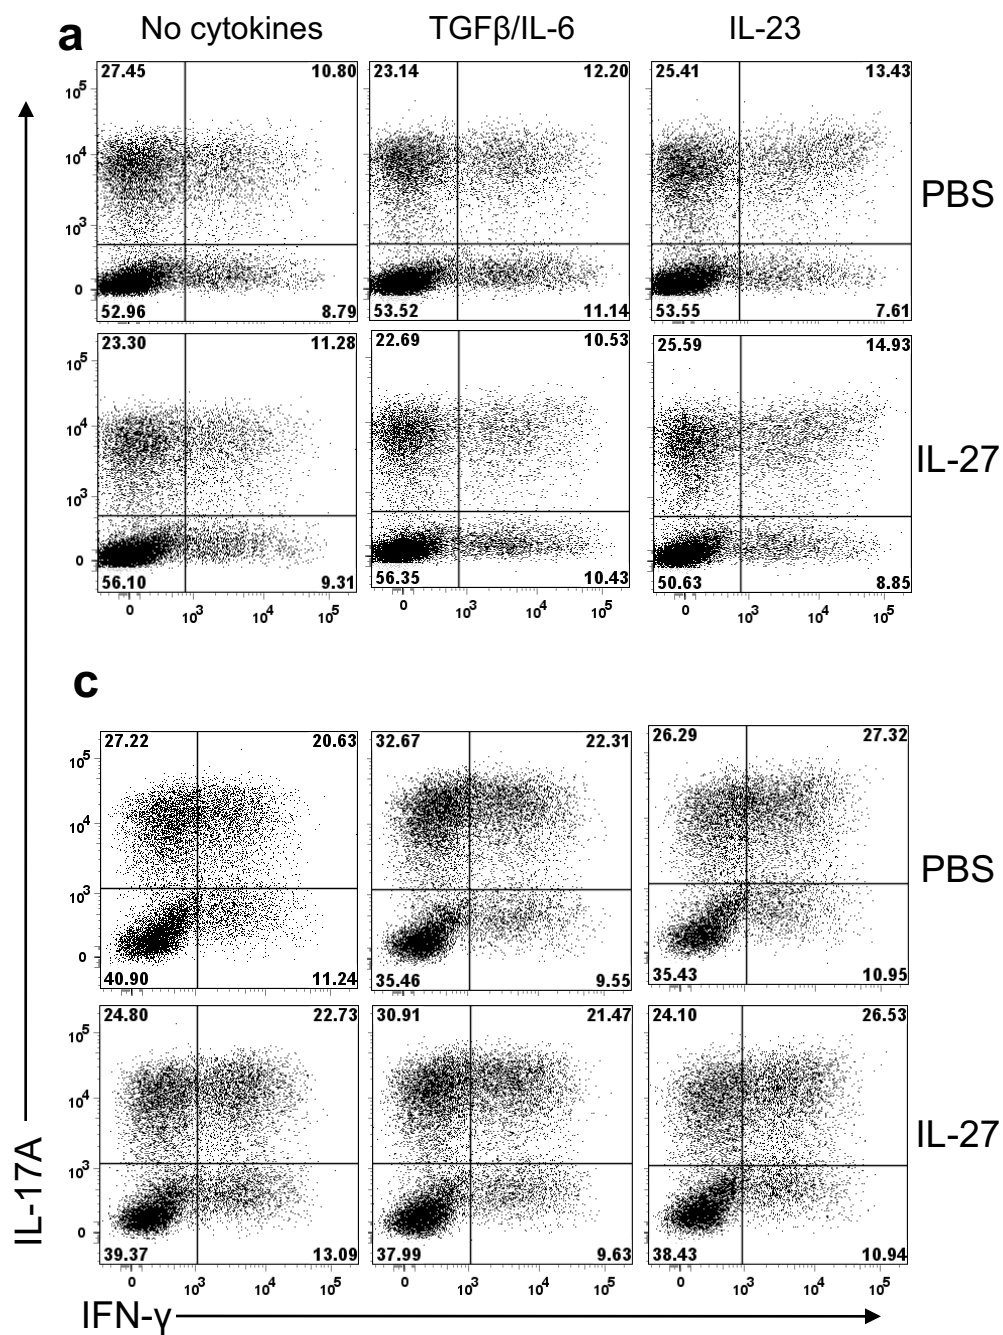

## Supplemental Figure 5

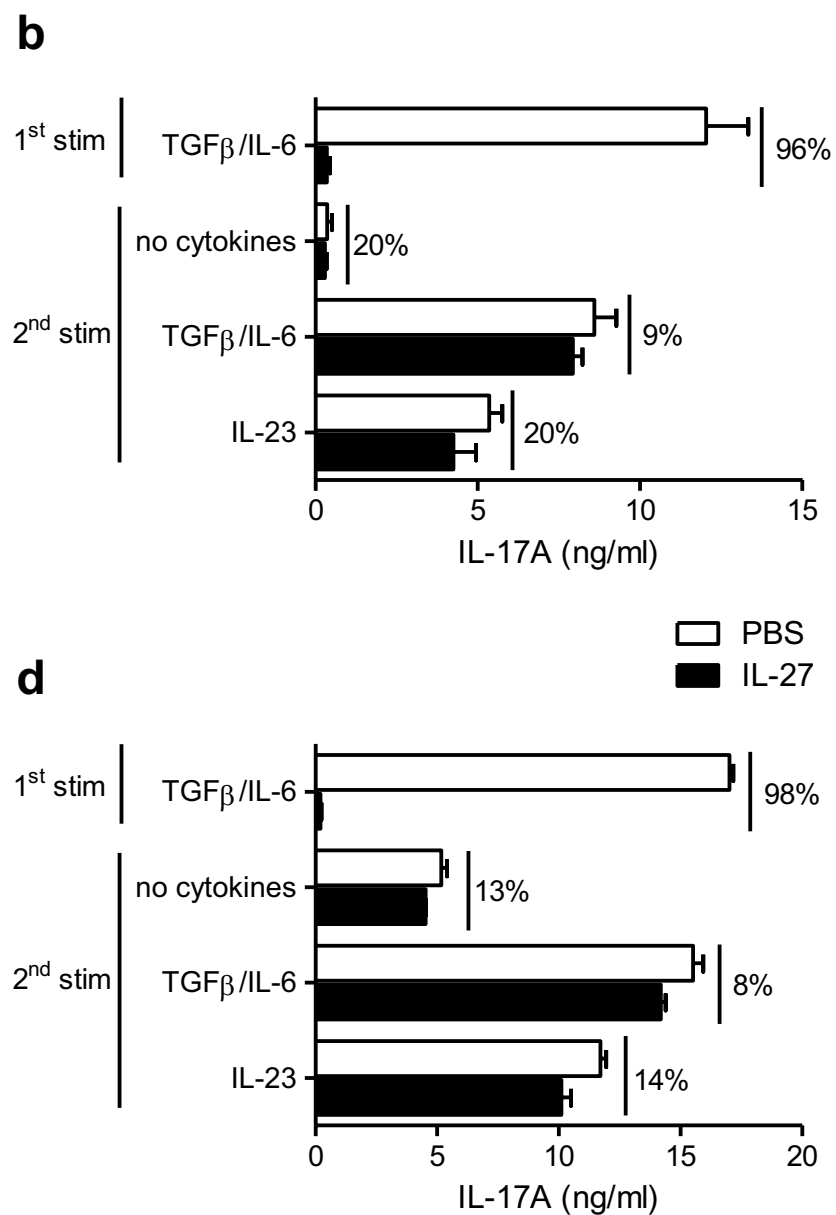

Supplement: NIHMS197333-supplement-1.pdf [file NIHMS197333-supplement-1.pdf]
